# Supplementary material for: Listeria monocytogenes Dampens the DNA Damage Response
Source: PubMed Central journal article supplement (PMC4207825; doi:10.1371/journal.ppat.1004470), 2014-10-23

Figure S1

**A**

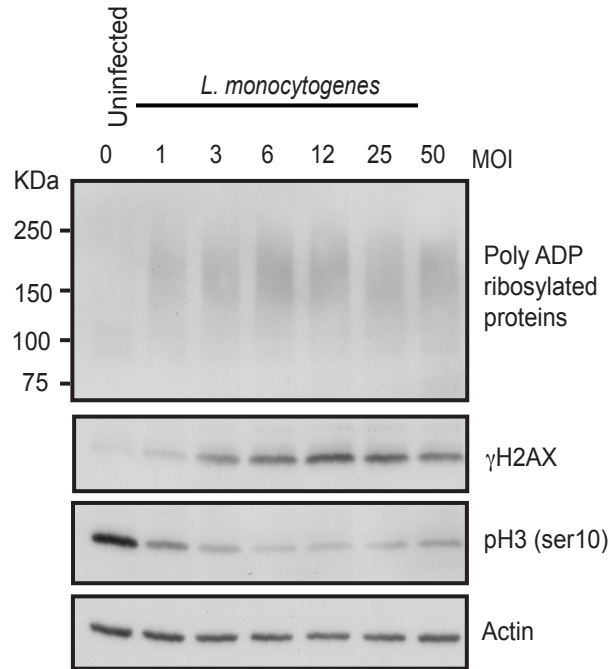

**B**

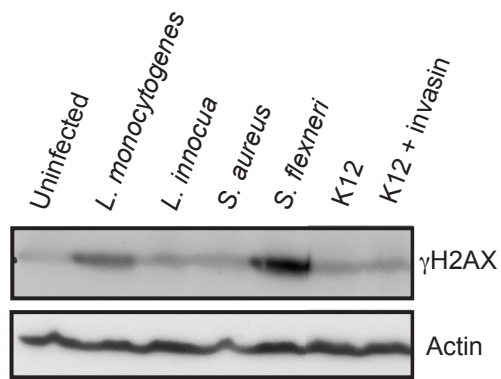

Supplement: ppat.1004470.s001.pdf [file ppat.1004470.s001.pdf]
