# Supplementary material for: Listeria monocytogenes Dampens the DNA Damage Response
Source: PubMed Central journal article supplement (PMC4207825; doi:10.1371/journal.ppat.1004470), 2014-10-23
Supplement: ppat.1004470.s002.pdf [file ppat.1004470.s002.pdf]

Figure S2

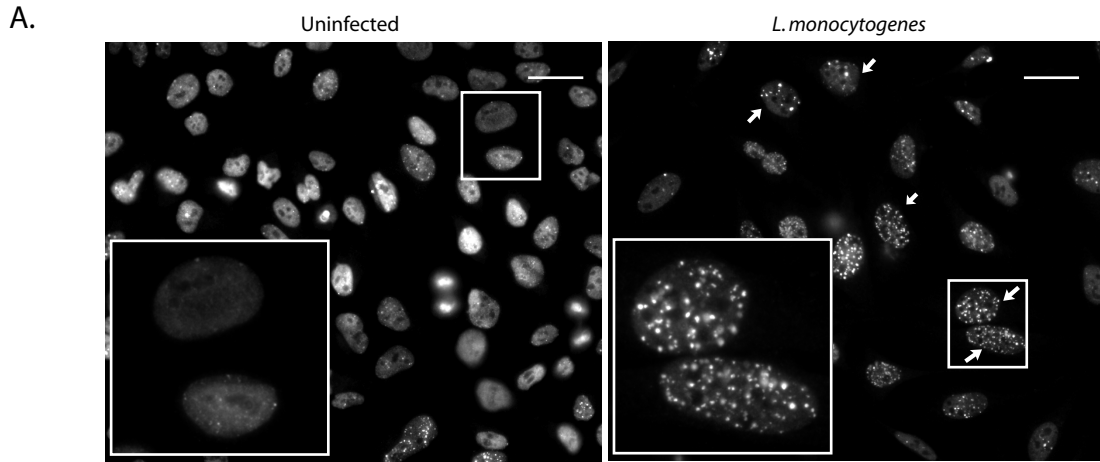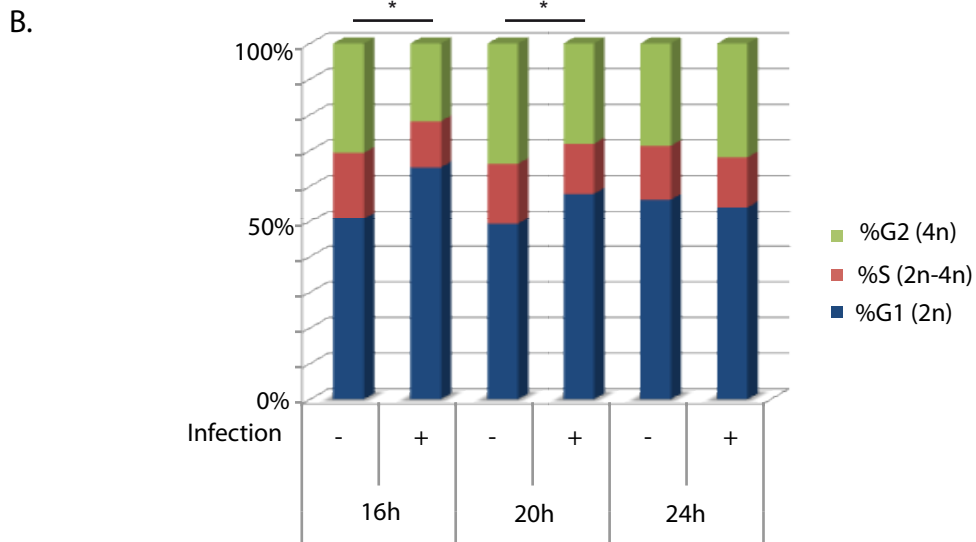

|               | 16h          |                  | 20h          |                  | 24h          |              |
|---------------|--------------|------------------|--------------|------------------|--------------|--------------|
| infection     | -            | +                | -            | +                | -            | +            |
| % G1 (2n)     | 50,8 +/- 5,8 | 65,3 +/- 3,5 (*) | 49,3 +/- 4,3 | 57,9 +/- 3,8 (*) | 55,1 +/- 4,5 | 54,1 +/- 7,2 |
| % S (2n - 4n) | 18,5 +/- 0,4 | 12,9 +/- 0,9 (*) | 17,0 +/- 1,5 | 14,03 +/- 0,8    | 14,8 +/- 2,9 | 14,0 +/- 1,5 |
| % G2 (4n)     | 30,6 +/- 5,9 | 21,8 +/- 2,9     | 33,7 +/- 5,8 | 28,1 +/- 3,1 (*) | 30,1 +/- 4,3 | 31,9 +/- 6,2 |
